# Supplementary material for: Genetic Spectrum of Idiopathic Restrictive Cardiomyopathy Uncovered by Next-Generation Sequencing
Source: PLoS One. 2016 Sep 23;11(9):e0163362. doi: 10.1371/journal.pone.0163362 (PMC5035084; doi:10.1371/journal.pone.0163362)
Supplement: S1 File — (DOCX) [file pone.0163362.s001.docx]

**S1 File. Data analysis description.**

**GATK pipeline**

We used GATK V.3.3-0, and Picard tools ver. 1.119 & ver. 1.128 because some functions work in one version of the program but does not work in another.

In order to avoid unnecessary problems, use the references provided by GATK team (<ftp://ftp.broadinstitute.org/bundle/>). All steps were performed on a GNU Linux virtual machine running Debian 7.7 (QEMI or VirtualBox Image available upon request). For a detailed description of the used programs and parameters, see the GATK manual from <https://www.broadinstitute.org/>

1) **.bam file reordering** - This step is necessary if you do not use the same reference for alignment and calling.

/picard-tools-1.128/picard.jar \

ReorderSam \

INPUT= /workingfolder/BAMFILE.bam \

OUTPUT= /workingfolder/SortedBAMFILE.bam \

SORT_ORDER=coordinate \

2) **.bam file sorting** - Step required after reordering

/picard-tools-1.128/picard.jar \

SortSam \

INPUT= /workingfolder/BAMFILE.bam \

OUTPUT= /workingfolder/SortBAMFILE.bam \

SORT_ORDER=coordinate \

3) **.bam file indexing** - Step required after sorting

/picard-tools-1.119/BuildBamIndex.jar \

INPUT= /workingfolder/SortedBAMFILE.bam \

OUTPUT = /workingfolder/ReordSortBAMFILE.bam \

4) **Restriction enzymes fingerprint clipping** - step is necessary for the correct allelic balance

/GenomeAnalysisTK-3.3-0/GenomeAnalysisTK.jar \

--analysis_type ClipReads \

--outputStatistics /workingfolder/stat.txt \

--reference_sequence /hg19GATK/ucsc.hg19.fasta \

--input_file /workingfolder/ReordSortBAMFILE.bam \

--out /workingfolder/ClipReordSortBAMFILE.bam \

--cyclesToTrim "1-5" \

5) **Realign table creation**

/GenomeAnalysisTK-3.3-0/GenomeAnalysisTK.jar \

--analysis_type RealignerTargetCreator \

--reference_sequence /hg19GATK/ucsc.hg19.fasta \

--input_file /workingfolder/ClipReordSortBAMFILE.bam \

--out /workingfolder/INTERVALFILE.intervals \

--allow_potentially_misencoded_quality_scores \

6) **Local realignment**

/GenomeAnalysisTK-3.3-0/GenomeAnalysisTK.jar \

--analysis_type IndelRealigner \

--reference_sequence / hg19GATK/ucsc.hg19.fasta \

--input_file /workingfolder/ClipReordSortBAMFILE.bam \

-targetIntervals /workingfolder/INTERVALFILE.intervals \

--out /workingfolder/RlnClipReordSortBAMFILE.bam \

--allow_potentially_misencoded_quality_scores \

7) **Recalibration table creation**

/GenomeAnalysisTK-3.3-0/GenomeAnalysisTK.jar \

--analysis_type BaseRecalibrator \

--input_file /workingfolder/RlnClipReordSortBAMFILE.bam \

--reference_sequence /hg19GATK/ucsc.hg19.fasta \

-knownSites /hg19GATK/dbsnp_138.hg19.vcf \

--out /workingfolder/RECALFILE. table \

8) **Recalibrated .bam file printing**

/GenomeAnalysisTK-3.3-0/GenomeAnalysisTK.jar \

--analysis_type PrintReads \

--reference_sequence /hg19GATK/ucsc.hg19.fasta \

--input_file /workingfolder/RlnClipReordSortBAMFILE.bam \

-BQSR /workingfolder/RECALFILE. table \

--out /workingfolder/RclRlnClipReordSortBAMFILE.bam \

9) **SNV calling using GATK UnifiedGenotyper**

/GenomeAnalysisTK-3.3-0/GenomeAnalysisTK.jar \

--reference_sequence /hg19GATK/ucsc.hg19.fasta \

--analysis_type UnifiedGenotyper \

--dbsnp /data500gb/References/hg19GATK/dbsnp_138.hg19.vcf \

--input_file /workingfolder/RclRlnClipReordSortBAMFILE.bam \

--intervals /workingfolder/Haloplex_Regions.bed \ **#from Agilent SureSelect**

-filterMBQ \

--annotation AlleleBalance \

--out /workingfolder/VCF.vcf \

-stand_call_conf 30.0 \

-stand_emit_conf 10.0 \

--downsampling_type NONE \

--output_mode EMIT_VARIANTS_ONLY \

--genotype_likelihoods_model BOTH \

10) **Variants filtration**

GenomeAnalysisTK-3.3-0/GenomeAnalysisTK.jar \

--logging_level INFO \

--reference_sequence /hg19GATK/ucsc.hg19.fasta \

--analysis_type VariantFiltration \

--variant /workingfolder/VCF.vcf \

--out /workingfolder/**FilteredVCF.vcf** \

--clusterWindowSize 10 \

--clusterSize 3 \

--filterExpression "MQ0 >= 4 && (( MQ0 / (1.0 * DP )) > 0.1)" \

--filterName " HARD_TO_VALIDATE " \

--filterExpression "DP < 10" \

--filterName " LowCoverage " \

--filterExpression "QUAL < 30.0" \

--filterName " VeryLowQual " \

--filterExpression "QUAL > 30.0 && QUAL < 50.0" \

--filterName " LowQual " \

--filterExpression "QD < 2.0" \

--filterName " LowQD \

As a result you will have the **FilteredVCF.vcf** file which you can annotate using variable open source and commercial software.

11) **VCF annotation using Annovar**

**a) convert VCF to Annovar format**

/convert2annovar.pl \

-format vcf4 \

/workingfolder/**FilteredVCF.vcf \**

-outfile /workingfolder/**FilteredVCF.vcf**.avinput \

-allsample \

-withfreq \

**b) Variation annotation**

/table_annovar.pl \

/workingfolder/**FilteredVCF.vcf**.avinput \

/annovardbpath/humandb/ \

-buildver hg19 \

-out /workingfolder/**FilteredVCF.csv** \

-remove \

-protocol refGene,ensGene,knownGene,snp138,ljb26_all \

-operation g,g,g,f,f \

-nastring . \

-csvout \

After this step you will have Excel compatible CSV, which you can use for human friendly analysis.

**Prediction analysis**

1. Data collection and preprocessing

The dataset used in our analysis contains 77 amino acid substitutions in 35 proteins uncovered by next-generation sequencing in patients suffering from idiopathic restrictive cardiomyopathy. We identified protein IDs from the Entrez portal 1 using names of mRNAs annotated by the Annovar-2 software 2. Relevant FASTA-formatted protein sequences were retrieved from the NCBI Reference Sequence Database (RefSeq; 3).

2. Prediction of mutation effects

Amino acid substitutions were classified as damaging or neutral by the following sequence-based prediction methods:

1. SNPs&GO 4, implemented as a Support Vector Machine (SVM), classifies mutations into two categories – Neutral or Disease – based on a number of input features, including the information on mutation type, sequence neighborhood of the mutated residue, evolutionary conservation obtained from sequence profiles, and functional annotation defined by Gene Ontology 4. In addition SNP&GO also considers as input mutation deleteriousness predicted by the PANTHER algorithm 5.
2. PROVEAN (Protein Variation Effect Analyzer 6) predicts functional impact of single amino acid substitutions as well as insertions, deletions, and multiple substitutions based on sequence alignments.
3. Polyphen-2 7 incorporates sequence conservation and predicts and protein structural properties (e.g. accessible surface area of amino acid residue) into a Naïve Bayes Framework.
4. SIFT 8 classifies mutations into Tolerated and Damaging by computing a combined score derived from the distribution of amino acid residues observed at a given position in the sequence alignment and the estimated unobserved frequencies of amino acids calculated from a Dirichlet mixture. To obtain sequence alignments target sequences were scanned against the UniRef90 database 9.
5. CADD (Combined Annotation–Dependent Depletion 10) is a support vector machine method for objectively integrating SIFT, PolyPhen-2, and GERP 11 annotations into a single measure (C score) for each variant. C-score correlates with allelic diversity, pathogenicity of both coding and non-coding variants, and experimentally measured regulatory effects. A C-score higher than 24 corresponds to a damaging mutation.
6. Mutation Assessor 12 captures the evolutionary conservation of a residue in a protein family and its subfamilies using combinatorial entropy measurement. It estimates a variant as functional (high, medium) or non-functional (low, neutral).

**References**

1. Database resources of the National Center for Biotechnology Information. *Nucleic Acids Res.* 2013;41(Database issue):D8-D20.

2. Wang K, Li M, Hakonarson H. ANNOVAR: functional annotation of genetic variants from high-throughput sequencing data. *Nucleic Acids Res.* 2010;38(16):e164.

3. Pruitt KD, Brown GR, Hiatt SM, et al. RefSeq: an update on mammalian reference sequences. *Nucleic Acids Res.* 2014;42(Database issue):D756-63.

4. Calabrese R, Capriotti E, Fariselli P, Martelli PL, Casadio R. Functional annotations improve the predictive score of human disease-related mutations in proteins. *Hum. Mutat.* 2009;30(8):1237-44.

5. Thomas PD, Campbell MJ, Kejariwal A, et al. PANTHER: a library of protein families and subfamilies indexed by function. *Genome Res.* 2003;13(9):2129-41.

6. Choi Y, Sims GE, Murphy S, Miller JR, Chan AP. Predicting the functional effect of amino acid substitutions and indels. *PLoS One* 2012;7(10):e46688.

7. Adzhubei I, Jordan DM, Sunyaev SR. Predicting functional effect of human missense mutations using PolyPhen-2. *Curr. Protoc. Hum. Genet.* 2013;(SUPPL.76):1-41.

8. Ng PC, Henikoff S. SIFT: Predicting amino acid changes that affect protein function. *Nucleic Acids Res.* 2003;31(13):3812-3814.

9. Suzek BE, Wang Y, Huang H, McGarvey PB, Wu CH. UniRef clusters: a comprehensive and scalable alternative for improving sequence similarity searches. *Bioinformatics* 2015;31(6):926-32.

10. Kircher M, Witten DM, Jain P, O’Roak BJ, Cooper GM, Shendure J. A general framework for estimating the relative pathogenicity of human genetic variants. *Nat. Genet.* 2014;46(3):310-5.

11. Cooper GM, Stone EA, Asimenos G, Green ED, Batzoglou S, Sidow A. Distribution and intensity of constraint in mammalian genomic sequence. *Genome Res.* 2005;15(7):901-13.

12. Reva B, Antipin Y, Sander C. Determinants of protein function revealed by combinatorial entropy optimization. *Genome Biol.* 2007;8(11):R232.
