# Supplementary material for: Genetic Spectrum of Idiopathic Restrictive Cardiomyopathy Uncovered by Next-Generation Sequencing
Source: PLoS One. 2016 Sep 23;11(9):e0163362. doi: 10.1371/journal.pone.0163362 (PMC5035084; doi:10.1371/journal.pone.0163362)
Supplement: S4 Table — (XLSX) [file pone.0163362.s005.xlsx]

## Sheet: Sheet1
S4 Table. List of the interactions with literature references supporting interaction network given in Figure 2
Subject	Interaction type	Object	PMID/Reference	CIDeR interaction ID
ABL1	interacts with	TMPO	17474147	53892
ACADVL	interacts with	CDH1	16212417	53893
ACTN2	interacts with	DMD	10328815	53965
ACTN2	interacts with	DYSF	23414517	53889
ACTN2	interacts with	MYOM2	23414517	53563
ACTN2	interacts with	MYOZ2	11842093	53280
ACTN2	interacts with	MYPN	11309420	53282
ACTN2	interacts with	PARVB	21257757	54015
ACTN2	interacts with	PDLIM3	23414517	53283
ACTN2	interacts with	VCL	21536590	54008
AKT1	affects activity of	GSK3B	12039794	54303
AKT1	affects expression of	HIF1A	24375547	54301
AKT1	increases phosphorylation of	LMNA	23430973	54169
ANK2	interacts with	CDH1	17620337	53895
ANK2	interacts with	DMD	21186323	54227
BAG3	interacts with	LDB3	19293945	53288
BAG3	interacts with	PDLIM3	23824909	53287
CACNB2	affects activity of	CACNA1C	17409629	50259
CACNB2	interacts with	CAV3	Biophys. J. (2010) 98:3, Suppl.1, 15A	54111
CAV1	affects activity of	CACNA1C	24202214	54071
CAV1	interacts with	CAV3	16818493	53777
CAV3	interacts with	DYSF	11532985	53710
CAV3	interacts with	HCN4	23311301	54120
CAV3	interacts with	JPH2	15541368	53782
CAV3	interacts with	KCNH2	22879586	53888
CAV3	interacts with	SCN5A	17060380	53887
CCND1	increases expression of	PDLIM3	18413728	53786
CDC42	interacts with	SYNE1	20936779	53849
CDH1	interacts with	VCL	9405455	53894
CTNNB1	affects expression of	MYH7	17673255	53617
DAG1	interacts with	DMD	25381372	53499
DMD	increases expression of	LDB3	20515474	53789
DMD	increases expression of	MYBPC3	20515474	53612
DMD	increases expression of	MYH7	20515474	53790
DSC2	interacts with	JUP	9443898	53358
DSP	interacts with	DES	9261168	53356
DSP	interacts with	DSC2	21220045	53359
DSP	interacts with	JUP	9348293	53355
DYSF	interacts with	DES	23414517	53943
DYSF	interacts with	MYOM1	23414517	53708
DYSF	interacts with	TTN	23414517	53709
DYSF	interacts with	VCL	21079765	54124
EMD	decreases quantity of	CTNNB1	19997769	53469
EMD	interacts with	LMNA	11792821	54118
FHL1	increases activity of	MYBPC3	16407297	53608
FHL1	interacts with	PDLIM3	23414517	53609
FHL1	interacts with	TTN	19679835	53610
FKTN	increases glycosylation of	DAG1	22922256	54366
FKTN	interacts with	POMGNT1	17034757	53496
GLI1	increases expression of	SYNE1	19706761	53876
GLI1	interacts with	ACADVL	11719506	53999
GSK3B	affects activity of	HIF1A	17325032	54306
GSK3B	affects phosphorylation of	TNNI3	19233194	54171
GSK3B	decreases quantity of	EMD	19997769	53467
HCN4	interacts with	ABL1	17474147	53891
HIF1A	increases expression of	TTN	18849322	53588
ILK	increases activity of	CDC42	17088456	53845
ILK	increases activity of	CTNNB1	22666394	54167
ILK	increases activity of	HIF1A	14749128	53587
ILK	increases expression of	CCND1	10915780	53785
ILK	increases expression of	PLN	25208486	54172
ILK	increases phosphorylation of	AKT1	21601006	54168
ILK	increases phosphorylation of	GSK3B	16951252	53474
ILK	increases phosphorylation of	ITGB1	8538749	54427
ILK	interacts with	CAV1	15722199	54426
ILK	interacts with	EMD	23455922	53361
ILK	interacts with	PARVB	21257757	54014
ILK	interacts with	RAN	23455922	53897
ILK	interacts with	SYNE2	23455922	53362
ILK	interacts with	VCL	17897939	53373
JUP	affects activity of	AKT1	21245375	54162
JUP	affects activity of	CTNNB1	21245375	54157
JUP	affects activity of	GSK3B	21245375	54160
JUP	interacts with	DES	22939629	53357
KCNE1	interacts with	KCNH2	9230439	53916
KCNE1	interacts with	KCNQ1	11101505	53913
KCNE2	interacts with	KCNH2	11278781	53917
KCNQ1	interacts with	KCNE2	11101505	53914
LDB3	interacts with	ACTN2	10427098	53279
LDB3	interacts with	MYOZ2	11842093	53351
LIMS1	increases expression of	ILK	19652092	54019
LIMS1	increases expression of	ITGB1	19652092	54021
LIMS1	increases expression of	PARVB	19652092	54020
LIMS1	interacts with	ILK	10022929	54725
LIMS1	interacts with	TTN	23414517	54018
LMNA	increases expression of	DES	22905185	54027
LMNA	interacts with	PDLIM3	22412018	54026
LMNA	interacts with	SYNE1	12163176	54023
LMNA	interacts with	SYNE2	15671068	54123
LMNA	interacts with	TMPO	10984438	54025
MYBPC3	interacts with	TTN	12202917	53482
MYH7	affects activity of	TNNT2	2404386	53954
MYOM1	interacts with	SYNE1	23414517	54121
MYOM2	interacts with	MYH7	23414517	53564
MYPN	interacts with	NEBL	11309420	53286
MYPN	interacts with	PDLIM3	23414517	53578
MYPN	interacts with	TTN	14583192	53352
NEBL	interacts with	VCL	18677772	54125
NFATC1	increases expression of	MYH7	17111365	53953
PDLIM3	interacts with	MYOZ2	23414517	53354
PLN	affects expression of	DES	14982994	54174
PLN	affects expression of	MYH7	14982994	53801
POMGNT1	increases glycosylation of	DAG1	17034757	53497
PRKCA	affects phosphorylation of	CACNA1C	15509562	53904
PRKCA	decreases activity of	KCNE1	1553557	53912
PRKCA	increases phosphorylation of	TNNI3	9346285	53901
PRKCA	increases phosphorylation of	TNNT2	2584239	53899
RANGRF	increases activity of	SCN5A	18184654	53944
RANGRF	interacts with	RAN	11290418	53896
SCN4B	interacts with	SCN5A	17592081	53942
SUN1	interacts with	SYNE1	22632968	53582
SUN1	interacts with	SYNE2	22632968	53581
SUN2	interacts with	SYNE1	22632968	53584
SUN2	interacts with	SYNE2	22632968	53583
SUN2	interacts with	TMEM43	21391237	53951
SYNE1	interacts with	EMD	12163176	53585
SYNE2	interacts with	EMD	15671068	54122
TMEM43	interacts with	EMD	21391237	53950
TNNI3	interacts with	TNNT2	12840750	53360
TRPM4	affects transport of	NFATC1	20656926	53952
TTN	decreases expression of	PLN	17261657	53800
TTN	interacts with	MYOM1	23414517	53285
TTN	interacts with	MYOM2	23414517	53572
TTN	interacts with	VCL	10987068	53375
